# Supplementary material
Source: publisher site journal article supplement (https://www.spandidos-publications.com/5200/downloadSupplementary)

Figure S1. Decrease of Slug protein level in human melanocytes and two melanoma cell lines (SK-MEL-2 and Hbl) after the GANT61 treatment. GANT61 treatment and western blotting were performed as described in Fig. 1B. The same anti-Slug and anti- $\beta$ -actin antibodies were used. He-MN-LP, normal human melanocytes (low pigmentation).

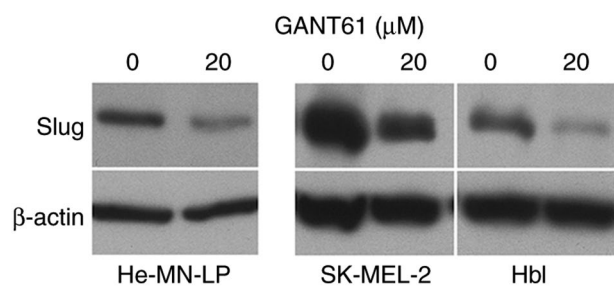

Figure S2. Representative immunofluorescent image indicating the decrease of Slug expression by GANT61 in four melanoma cell lines. Left panel shows the cells treated only by vehicle (DMSO), right panel depicts the low Slug expression after GANT61 application. Cells were treated with GANT61 for 20 h and processed for immunofluorescence. The left columns indicate staining with anti-Slug antibody. The same fields are visualized also by DAPI staining. Scale bar, 20  $\mu$ m.

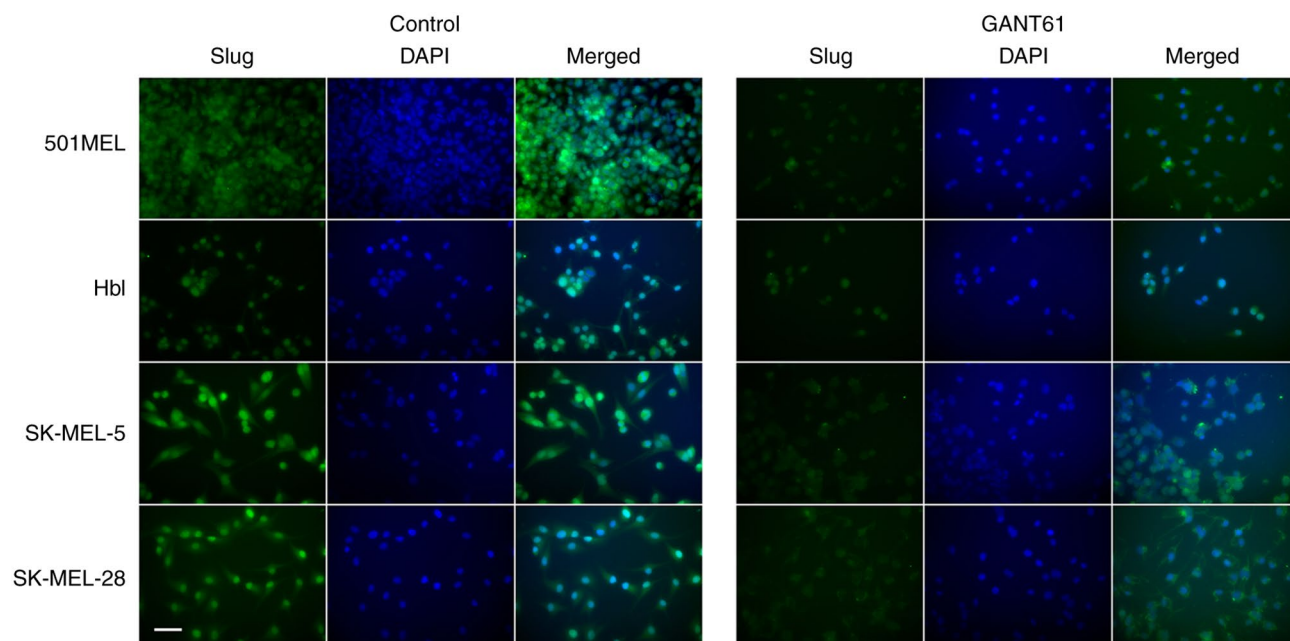

Supplement: Supplementary file 1 [file downloadSupplementary]
